# Supplementary material for: Facile fabrication of a rigid and chemically resistant micromixer system from photocurable inorganic polymer by static liquid photolithography (SLP)
Source: Royal Society of Chemistry journal article supplement (doi:10.1039/c1lc20118b), 2011-01-01
Supplement: c1lc20118b.pdf [file c1lc20118b.pdf]

## ELECTRONIC SUPPLEMENTARY INFORMATION

### Facile Fabrication of a Rigid and Chemical Resistant Micromixer System from Photocurable Inorganic Polymer by Static Liquid Photolithography (SLP)

Qingling Fang, Dong-Pyo Kim, Xiaodong Li, Tae-Ho Yoon and Yihe Li

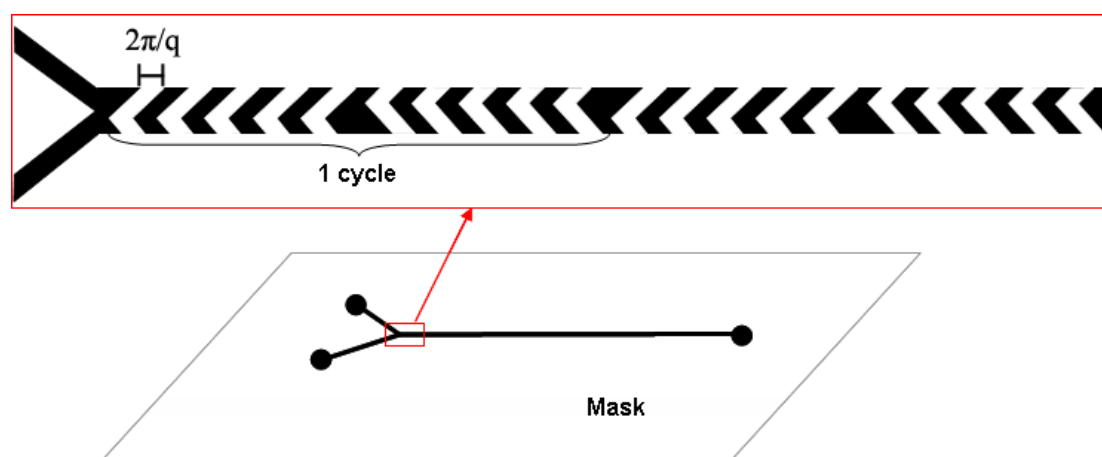

**Figure S1** Schematic images of plastic mask for fabricating the herringbone micromixer structure in a main channel of width  $400\ \mu\text{m}$ , and 10 ridges per cycle with principal wave vector of  $q = 2\pi/200\ \mu\text{m}^{-1}$ . The fraction of the width of the channel occupied by the wide arms of the herringbones is  $2/3$ ; the inclination of the arms of the herringbone structure to the channel sidewalls is  $45^\circ$ ; two inlet channels of  $0.6\ \text{cm}$  in length have  $45^\circ$  obliquity with respect to the main channel.

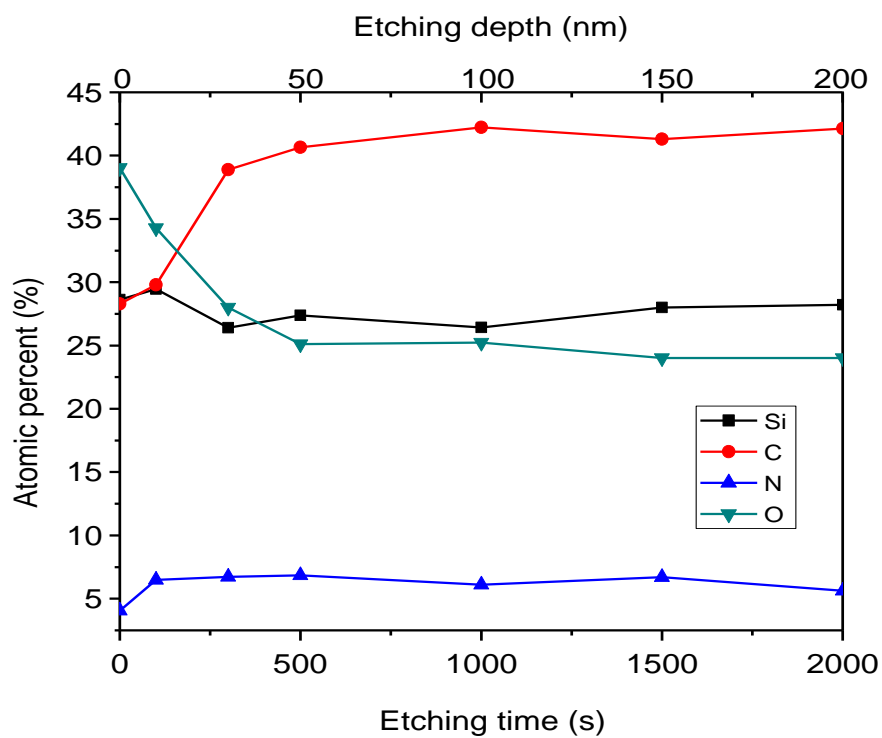

**Figure S2** XPS depth profile of hydrolyzed MPVSZ film sample. Etching depth was calibrated with silica as a reference material.
